# Supplementary material
Source: publisher site journal article supplement (https://www.dovepress.com/get_supplementary_file.php?f=343125.docx)
Supplement: Supplementary file 1 [file get_supplementary_file.php]

**SUPPLEMENT DATA**

Supplement Table 1. Comparison of Biomarker Concentration between Endoscopic Remission and Endoscopic Activity in Training Cohort.

| Biomarkers | Endoscopic remission | Endoscopic activity | p value |
| --- | --- | --- | --- |
| Prealbumin (mg/L) | 254.0 (216.5-292.0) | 184.0 (147.0-225.0) | <0.001 |
| Retinol binding protein 4 (mg/L) | 27.9 (22.8-32.1) | 20.7 (16.3-25.8) | <0.001 |
| Vitamin D (ng/mL) | 19.0 (13.5-22.0) | 16.0 (12.0-21.0) | 0.018 |
| Total protein (g/L) | 65.3 (61.8-71.4) | 65.3 (59.8-70.2) | 0.322 |
| Albumin (g/L) | 40.0 (35.4-42.4) | 35.4 (31.2-38.7) | <0.001 |
| Globulin (g/L) | 26.7 (23.1-30.0) | 29.5 (25.5-33.4) | 0.001 |
| C-reactive protein (mg/L) | 1.69 (0.77-5.82) | 14.7 (3.34-33.2) | <0.001 |
| Faecal calprotectin (mg/kg) | 21.0 (14.0-115.0) | 330.0 (88.0-891.0) | <0.001 |

The concentration of biomarkers was described as median (interquartile range). Mann-Whitney test was performed to compare the level of biomarkers between endoscopic remission and endoscopic activity.

Supplement Table 2. The Area Under Receiver Operating Characteristic Curve (AUROC) of the Biomarkers in the Training Cohort.

| Biomarkers | AUROC (95% CI) | p value |
| --- | --- | --- |
| Prealbumin | 0.773 (0.705-0.841) | <0.001 |
| Retinol binding protein 4 | 0.728 (0.646-0.809) | <0.001 |
| Vitamin D | 0.606 (0.525-0.688) | 0.018 |
| Total protein | 0.541 (0.464-0.618) | 0.321 |
| Albumin | 0.704 (0.632-0.776) | <0.001 |
| Globulin | 0.636 (0.561-0.712) | 0.001 |
| C-reactive protein | 0.759 (0.693-0.826) | <0.001 |
| Faecal calprotectin | 0.815 (0.727-0.904) | <0.001 |

Supplement Figure 1


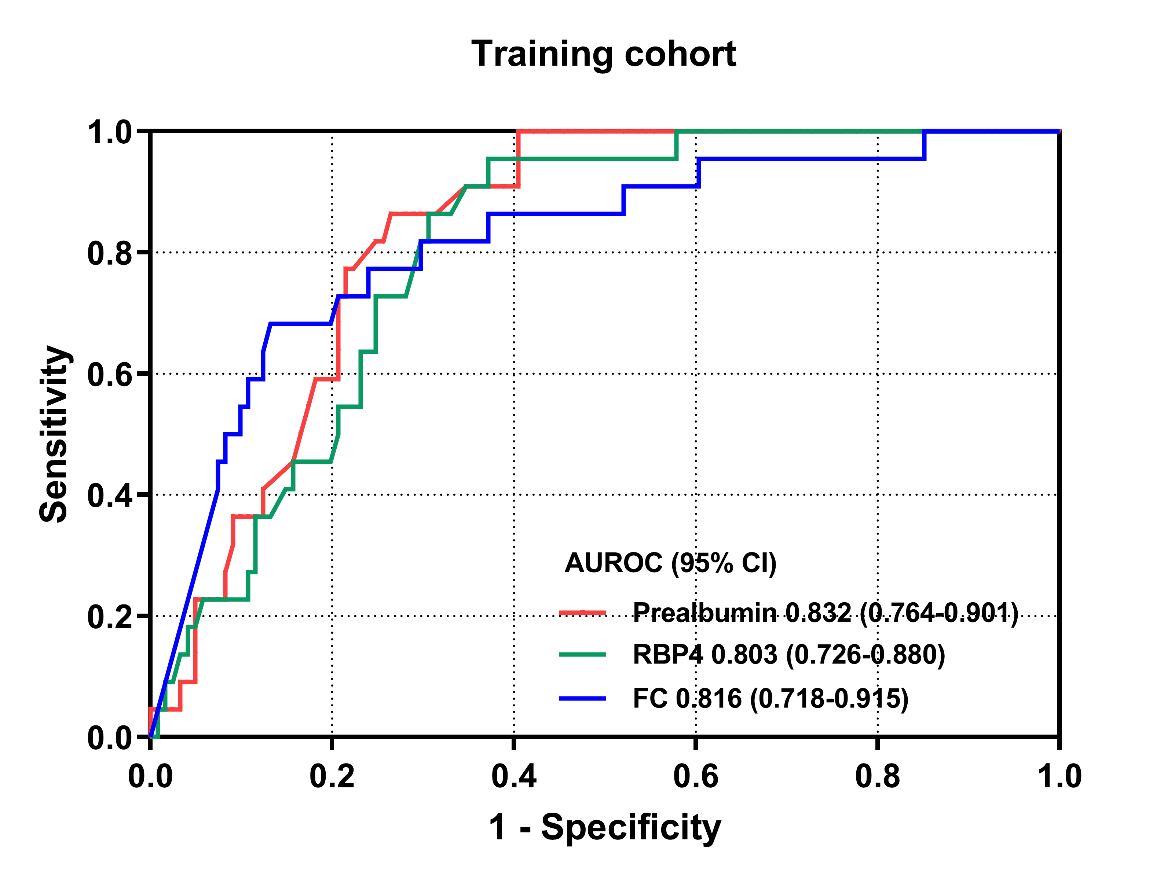


Supplement Figure 2


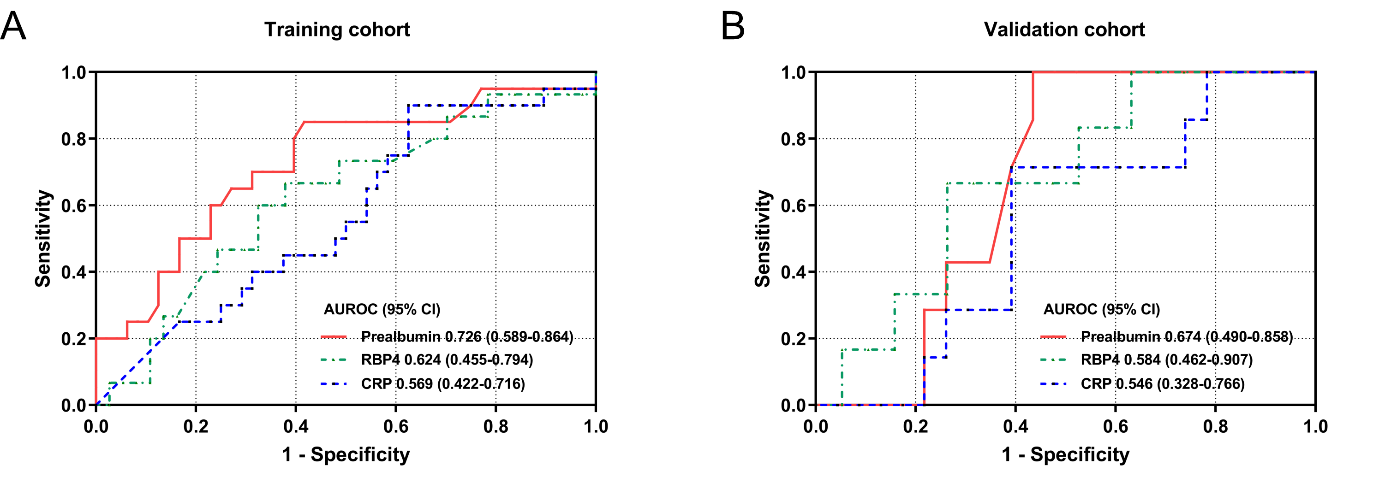


Supplement Figure Legends

Supplement Figure 1. Receiver operating characteristic (ROC) curve of prealbumin, retinol-binding protein 4 (RBP4) and faecal calprotectin (FC) for identifying endoscopic remission in patients with available data of all these three biomarkers.

Supplement Figure 2. Receiver operating characteristic (ROC) curve of prealbumin, retinol-binding protein 4 (RBP4), C-reactive protein (CRP) for identifying endoscopic remission in patients with ileal disease in the training cohort [A] or the validation cohort [B].
